# Supplementary material for: Analysis and Characterization of Proteins Associated with Outer Membrane Vesicles Secreted by Cronobacter spp
Source: PubMed Central journal article supplement (PMC5299011; doi:10.3389/fmicb.2017.00134), 2017-02-09
Supplement: Table1.pdf [file Table1.pdf]

Supplemental Table 1. Strain names, CFSAN isolate names, strain species identities<sup>a</sup>, NCBI Accession numbers, and NCBI Bioproject numbers used to develop the phylogenetic tree in Figure 4.

| <b>Strain</b>  | <b>GenBank Locus</b> | <b>NCBI Protein ID</b> | <b>NCBI BioSample ID</b> | <b>NCBI Isolate ID</b> | <b><i>Cronobacter</i> spp.</b> | <b>Serotype<sup>b</sup></b> |
|----------------|----------------------|------------------------|--------------------------|------------------------|--------------------------------|-----------------------------|
| MOD1-0407-77*  | KU354351             | ANC61565               | SAMN04329627             | CFSAN043075            | sakazakii                      | O:1                         |
| MOD1-1121-73** | KU354405             | ANC61619               | SAMN04329632             | CFSAN043080            | sakazakii                      | O:2                         |
| MOD1-1241      | KU354406             | ANC61620               | SAMN04329588             | CFSAN043036            | sakazakii                      | O:4                         |
| MOD1-1242**    | KU354389             | ANC61603               | SAMN04329597             | CFSAN043045            | sakazakii                      | O:4                         |
| MOD1-206       | KU354383             | ANC61597               | SAMN04329598             | CFSAN043046            | sakazakii                      | O:2                         |
| MOD1-207N      | KU354404             | ANC61618               | SAMN04329599             | CFSAN043047            | sakazakii                      | O:2                         |
| MOD1-208N      | KU354371             | ANC61585               | SAMN04329600             | CFSAN043048            | sakazakii                      | O:2                         |
| MOD1-2156      | KU354369             | ANC61583               | SAMN04329601             | CFSAN043049            | sakazakii                      | O:3                         |
| MOD1-2157      | KU354374             | ANC61588               | SAMN04329602             | CFSAN043050            | sakazakii                      | O:2                         |
| MOD1-228N      | KU354386             | ANC61600               | SAMN04329603             | CFSAN043051            | sakazakii                      | O:2                         |
| MOD1-229N      | KU354416             | ANC61630               | SAMN04329604             | CFSAN043052            | sakazakii                      | O:2                         |
| MOD1-254N      | KU354410             | ANC61624               | SAMN04329589             | CFSAN043037            | sakazakii                      | O:1                         |
| MOD1-255N      | KU354367             | ANC61581               | SAMN04329605             | CFSAN043053            | sakazakii                      | O:2                         |
| MOD1-302       | KU354372             | ANC61586               | SAMN04329606             | CFSAN043054            | sakazakii                      | O:2                         |
| MOD1-303N      | KU354396             | ANC61610               | SAMN04329607             | CFSAN043055            | sakazakii                      | O:2                         |
| MOD1-304N      | KU354413             | ANC61627               | SAMN04329608             | CFSAN043056            | sakazakii                      | O:2                         |
| MOD1-305**     | KU354403             | ANC61617               | SAMN04329590             | CFSAN043038            | sakazakii                      | O:1                         |
| MOD1-306N      | KU354394             | ANC61608               | SAMN04329609             | CFSAN043057            | sakazakii                      | O:2                         |
| MOD1-3128-77*  | KU354360             | ANC61574               | SAMN04329648             | CFSAN043096            | sakazakii                      | O:1                         |
| MOD1-4963-71*  | KU354390             | ANC61604               | SAMN04329591             | CFSAN043039            | sakazakii                      | O:1                         |
| MOD1-607-A     | KU354352             | ANC61566               | SAMN04329646             | CFSAN043094            | sakazakii                      | O:2                         |

|                      |          |          |              |             |             |     |
|----------------------|----------|----------|--------------|-------------|-------------|-----|
| MOD1-C120505         | KU354359 | ANC61573 | SAMN04329626 | CFSAN043074 | sakazakii   | O:2 |
| MOD1-CDC2006-06-25** | KU354373 | ANC61587 | SAMN04329595 | CFSAN043043 | sakazakii   | O:2 |
| MOD-1CDC2011-21-03   | KU354345 | ANC61559 | SAMN04329596 | CFSAN043044 | sakazakii   | O:2 |
| MOD1-comp11          | KU354364 | ANC61578 | SAMN04329633 | CFSAN043081 | sakazakii   | O:2 |
| MOD1-comp19          | KU354395 | ANC61609 | SAMN04329634 | CFSAN043082 | sakazakii   | O:2 |
| MOD1-comp20          | KU354349 | ANC61563 | SAMN04329635 | CFSAN043083 | sakazakii   | O:2 |
| MOD1-comp45b         | KU354377 | ANC61591 | SAMN04329640 | CFSAN043088 | sakazakii   | O:2 |
| MOD1-comp46          | KU354411 | ANC61625 | SAMN04329636 | CFSAN043084 | sakazakii   | O:2 |
| MOD1-comp49b         | KU354354 | ANC61568 | SAMN04329641 | CFSAN043089 | sakazakii   | O:2 |
| MOD1-comp53b         | KU354368 | ANC61582 | SAMN04329642 | CFSAN043090 | sakazakii   | O:2 |
| MOD1-comp54a         | KU354370 | ANC61584 | SAMN04329643 | CFSAN043091 | sakazakii   | O:2 |
| MOD1-comp55* **      | KU354323 | ANC61537 | SAMN04329652 | CFSAN043100 | sakazakii   | O:2 |
| MOD1-comp57b*        | KU354417 | ANC61631 | SAMN04329644 | CFSAN043092 | sakazakii   | O:2 |
| MOD1-comp59a         | KU354402 | ANC61616 | SAMN04329645 | CFSAN043093 | sakazakii   | O:2 |
| MOD1-comp62*         | KU354382 | ANC61596 | SAMN04329592 | CFSAN043040 | sakazakii   | O:2 |
| MOD1-CQ111           | KU354375 | ANC61589 | SAMN04329610 | CFSAN043058 | sakazakii   | O:3 |
| MOD1-CQ126*          | KU354391 | ANC61605 | SAMN04329611 | CFSAN043059 | sakazakii   | O:3 |
| MOD1-CQ127           | KU354401 | ANC61615 | SAMN04329612 | CFSAN043060 | sakazakii   | O:3 |
| MOD1-CQ128           | KU354418 | ANC61632 | SAMN04329613 | CFSAN043061 | sakazakii   | O:3 |
| MOD1-CQ39* **        | KU354407 | ANC61621 | SAMN04329651 | CFSAN043099 | malonaticus | O:1 |
| MOD1-CQ6*            | KU354392 | ANC61606 | SAMN04329614 | CFSAN043062 | sakazakii   | O:2 |
| MOD1-CQ6a            | KU354414 | ANC61628 | SAMN04329615 | CFSAN043063 | sakazakii   | O:2 |
| MOD1-Crono-2148      | KU354366 | ANC61580 | SAMN04329616 | CFSAN043064 | sakazakii   | O:2 |
| MOD1-Crono-2150      | KU354347 | ANC61561 | SAMN04329617 | CFSAN043065 | sakazakii   | O:2 |

|                  |          |          |              |             |             |     |
|------------------|----------|----------|--------------|-------------|-------------|-----|
| MOD1-Crono-2152  | KU354358 | ANC61572 | SAMN04329618 | CFSAN043066 | sakazakii   | O:2 |
| MOD1-Crono-2154  | KU354346 | ANC61560 | SAMN04329619 | CFSAN043067 | sakazakii   | O:2 |
| MOD1-Crono-2155* | KU354365 | ANC61579 | SAMN04329620 | CFSAN043068 | sakazakii   | O:2 |
| MOD1-E532*       | KU354327 | ANC61541 | SAMN04329580 | CFSAN043028 | malonaticus | O:1 |
| MOD1-E654        | KU354408 | ANC61622 | SAMN04329593 | CFSAN043041 | sakazakii   | O:1 |
| MOD1-E656*       | KU354350 | ANC61564 | SAMN04329628 | CFSAN043076 | sakazakii   | O:1 |
| MOD1-E657        | KU354412 | ANC61626 | SAMN04329594 | CFSAN043042 | sakazakii   | O:1 |
| MOD1-E755        | KU354381 | ANC61595 | SAMN04329629 | CFSAN043077 | sakazakii   | O:4 |
| MOD1-E756        | KU354380 | ANC61594 | SAMN04329630 | CFSAN043078 | sakazakii   | O:4 |
| MOD1-E758B**     | KU354387 | ANC61601 | SAMN04329631 | CFSAN043079 | sakazakii   | O:4 |
| MOD1-E760A       | KU354357 | ANC61571 | SAMN04329647 | CFSAN043095 | sakazakii   | O:2 |
| MOD1-E788B*,**   | KU354348 | ANC61562 | SAMN04329621 | CFSAN043069 | sakazakii   | O:2 |
| MOD1-E831        | KU354338 | ANC61552 | SAMN04329581 | CFSAN043029 | malonaticus | O:1 |
| MOD1-E833*       | KU354316 | ANC61530 | SAMN04329582 | CFSAN043030 | malonaticus | O:1 |
| MOD1-E837*,**    | KU354388 | ANC61602 | SAMN04329649 | CFSAN043097 | sakazakii   | O:2 |
| MOD1-E893        | KU354385 | ANC61599 | SAMN04329622 | CFSAN043070 | sakazakii   | O:2 |
| MOD1-E902*       | KU354276 | ANC61490 | SAMN04329587 | CFSAN043035 | malonaticus | O:2 |
| MOD1-ES30        | KU354376 | ANC61590 | SAMN04329623 | CFSAN043071 | sakazakii   | O:2 |
| MOD1-ES32        | KU354355 | ANC61569 | SAMN04329624 | CFSAN043072 | sakazakii   | O:2 |
| MOD1-ES33*,**    | KU354397 | ANC61611 | SAMN04329650 | CFSAN043098 | sakazakii   | O:7 |
| MOD1-ES34        | KU354379 | ANC61593 | SAMN04329625 | CFSAN043073 | sakazakii   | O:2 |
| MOD1-GK1025B     | KU354398 | ANC61612 | SAMN04329637 | CFSAN043085 | sakazakii   | O:2 |
| MOD1-GK1026      | KU354353 | ANC61567 | SAMN04329638 | CFSAN043086 | sakazakii   | O:2 |
| MOD1-GK1257      | KU354400 | ANC61614 | SAMN04329578 | CFSAN043026 | muytjensii  | ND  |

|              |          |          |              |             |             |     |
|--------------|----------|----------|--------------|-------------|-------------|-----|
| MOD1-GK1258* | KU354272 | ANC61486 | SAMN04329579 | CFSAN043027 | muytjensii  | ND  |
| MOD1-GK1326* | KU354300 | ANC61514 | SAMN04329639 | CFSAN043087 | sakazakii   | O:2 |
| MOD1-GK1355  | KU354313 | ANC61527 | SAMN04329583 | CFSAN043031 | malonaticus | O:5 |
| MOD1-GK796*  | KU354337 | ANC61551 | SAMN04329584 | CFSAN043032 | malonaticus | O:5 |
| MOD1-GK962   | KU354311 | ANC61525 | SAMN04329585 | CFSAN043033 | malonaticus | O:5 |
| MOD1-Md1s*   | KU354270 | ANC61484 | SAMN04329654 | CFSAN043102 | turicensis, | ND  |
| MOD1-Md25g*  | KU354278 | ANC61492 | SAMN04329586 | CFSAN043034 | malonaticus | O:2 |
| MOD1-Md27g*  | KU354281 | ANC61495 | SAMN04329653 | CFSAN043101 | sakazakii   | ND  |

<sup>a</sup>Specific PCR assays as described by Stoop et al. (2009), Lehner et al. (2012) and Carter et al. (2013) were used to confirm the species identities of the isolates.

<sup>b</sup>Serotype was determined as described by Yan et al. (2015a)

\* Strains denoted with an asterisk were used to develop the phylogenetic tree shown in Figure 4.

\*\* Strains denoted with an a double asterisk were used to compare the amino acid sequences.

Stoop B, Lehner A, Iversen C, Fanning S, Stephan R. 2009. Development and evaluation of rpoB based PCR systems to differentiate the six proposed species within the genus *Cronobacter*. Intern J Food Microbiol 136:165-168.

Lehner A, Fricker-Feer C, Stephan R. 2012. Identification of the recently described *Cronobacter condimenti* by a rpoB based PCR system. J Med Microbiol 61:1034-1035. doi: 10.1099/jmm.0.042903-0. Epub 2012.

Carter L, Lindsey LA, Grim CJ, Sathyamoorthy V, Jarvis KG, Gopinath G, Lee C, Sadowski JA, Trach L, Pava-Ripoll M, McCardell BA, Tall BD, Hu L. 2013. Multiplex PCR assay targeting a diguanylate cyclase-encoding gene, *cgcA*, to differentiate species within the genus *Cronobacter*. Appl Environ Microbiol 79:734-737. doi: 10.1128/AEM.02898-12. Epub 2012 Nov 9.

Yan, Q. Q., Jarvis, K. G., Chase, H. R., & Hébert, K., et al. (2015a). A proposed harmonized LPS molecular-based serotyping scheme for *Cronobacter* to aid in tracking its presence in manufacturing facilities and our food supply, and support clinical findings.

Food Microbiol. 50, 38-43. doi: 10.1016/j.fm.2015.03.003. Epub 2015 Mar 17.
